# Supplementary material for: Whole brain correlates of individual differences in skin conductance responses during discriminative fear conditioning to social cues
Source: eLife. 2022 Nov 22;11:e69686. doi: 10.7554/eLife.69686 (PMC9721615; doi:10.7554/eLife.69686)
Supplement: Figure 1—source data 1. — Scatter plots depicting correlation between SCR difference scores and eigenvariates from significant neural regions were rendered using JASP version 0.14.1 (JASP Team, 2020). SCR source data was computed within the Ledalab software package (v 3.4.9; Benedek and Kaernbach, 2010) implemented in Matlab 2020a (Mathworks, Inc, Natick, MA) and individual SCR difference scores were computed using the JASP software (see Materials and methods, sections 4.2.4 and 4.3.2). fMRI source data was computed from the SPM software and extracted as eigenvariates from all significant clusters (see Materials and methods, section 4.3.3) and matched to the corresponding SCR difference scores in a comma separated values (CSV) file (attached). Within the attached file you can find SCR scores for each participant using both Z transformation and square root transformation, as well as average SCR responding to the CS+ and CS-, separately. Also included are extracted eigenvariates from all implicated regions in the whole brain analysis and the amygdala ROI analysis (section 2.2.2). Notice that this data also constitutes source data for Figure 2B as well as for statistical analyses reported in section 2.2.3 and for Appendix 1—figure 1, Appendix 2—figure 1, and Appendix 5—table 1. [file elife-69686-fig1-data1.csv]

Subject	SCR_Difference_Score_CSplus_minus_Csminus	cs_plus_z_transformation	cs_minus_z_transformation	CSplus_Square_root_tranformed_raw_value_SCR	CSminus_Square_root_transformed_raw_value_SCR	cs_plus_vs_cs_minus_square_root_transformed_raw_value_SCR	Right_amygdala_eigenvariates	Left_amygdala_eigenvariates	Right_inferior_frontal_gyrus_eigenvariates	Right_temporoparietal_junction_eigenvariates	Right_Brainstem_eigenvariates	Right_superior_frontal_gyrus_eigenvariates	dorsal_anterior_cingulate_cortex_eigenvariates	Right_anterior_insula_eigenvariates	Right_superior_parietal_lobe_eigenvariates	Left_superior_frontal_gyrus_eigenvariates	Left_temporoparietal_junction_eigenvariates
10130	1.102723793	0.55979912	-0.542924673	0.880314485	0.551181368	0.329133117	0.3368	0.4797	0.6108	0.1343	0.2995	0.4973	0.6339	0.5153	0.4073	-0.2732	0.837
10131	0.74068732	0.292246354	-0.448440966	0.412608164	0.224050269	0.188557895	0.2896	0.1347	0.4695	0.274	0.4902	0.3504	0.4966	0.4741	0.6334	0.4023	0.2847
10132	0.852323978	0.300692097	-0.551631881	0.643022478	0.348452637	0.294569841	0.2234	0.1883	0.823	0.5035	0.3947	0.5169	0.5288	0.7591	0.2884	0.5959	0.3375
10133	1.315917387	0.798139681	-0.517777706	1.162114118	0.649842194	0.512271923	-0.4956	-0.4006	0.5366	0.1628	-0.037	-0.3884	0.6083	-0.1906	-0.9063	-0.9237	-0.0396
10134	1.350148811	0.778702802	-0.571446009	0.578081168	0.33895582	0.239125348	0.5422	0.5806	0.8978	0.4319	0.0796	0.2148	0.7128	0.3958	0.4806	0.4886	0.9441
10147	0.281909924	0.189833062	-0.092076862	0.533666831	0.435720399	0.097946432	0.4078	0.1276	0.3155	0.501	0.2753	0.3242	0.6584	0.5017	0.1096	0.4318	0.4379
10148	0.642727855	0.297867459	-0.344860396	0.33714351	0.268912065	0.068231445	0.5278	0.5296	0.4798	0.2733	0.0779	0.218	0.2105	0.2617	0.2749	0.091	0.4471
10149	0.376603237	0.019977103	-0.356626134	0.137821568	0.097060025	0.040761543	0.776	0.5101	0.3516	-0.0364	0.3095	0.2277	0.7216	0.4427	0.3212	0.2289	0.3951
10150	1.11036946	0.352936351	-0.757433108	0.836636922	0.401693059	0.434943863	0.2687	0.0895	0.9182	1.0596	0.2787	0.2381	0.7466	0.6434	-0.0475	0.4907	0.3335
10157	0.365482533	0.195864707	-0.169617825	0.204165573	0.161540717	0.042624856	-0.2175	-0.0683	-0.073	-0.1178	-0.1516	-0.0105	-0.0103	0.3027	-0.3659	-0.0312	-0.0082
10158	1.175935722	0.55106396	-0.624871762	0.520586361	0.269193692	0.251392669	0.2481	0.2108	1.2449	0.3459	0.4783	0.1569	0.222	0.429	0.3539	0.6187	0.515
10159	1.20642093	0.563160418	-0.643260511	0.536778894	0.328396396	0.208382498	-0.2701	-0.61	0.709	0.3048	-0.249	0.4965	1.5089	0.9309	0.8221	-0.3522	-0.6898
10160	0.662118416	0.268782131	-0.393336285	0.670094178	0.460986436	0.209107741	0.2188	-0.0256	0.3739	0.5873	0.3117	0.1776	0.7021	0.6077	-0.1502	0.1321	0.3936
10172	-0.296319689	-0.459721119	-0.16340143	0.172807322	0.255517535	-0.082710213	0.3954	0.1115	0.5271	0.4951	0.2116	-0.0248	0.3049	0.5114	0.4689	0.075	0.8871
10173	0.936222277	0.309510481	-0.626711795	0.833460356	0.39487321	0.438587145	0.5156	0.2723	0.5994	0.3185	0.633	0.3104	0.4513	0.9075	0.6852	0.2515	0.2129
10174	0.858388803	0.355322904	-0.503065899	0.3825645	0.187479555	0.195084945	0.4712	0.2907	0.8829	0.7302	0.3857	-0.0225	0.4512	0.5521	0.1973	0.1645	0.1279
10175	0.29599836	-0.131792935	-0.427791295	0.152876223	0.115216744	0.037659479	0.3647	0.0305	0.1056	0.3394	0.3677	0.1858	0.4637	0.3501	0.3323	0.109	0.1791
10176	1.028111203	0.632619679	-0.395491525	0.517477538	0.22616043	0.291317108	-0.3531	-0.0419	0.5896	0.1864	-0.1082	0.235	0.853	0.9057	0.2395	0.7939	-0.1479
10190	-0.164487282	-0.17062713	-0.006139848	0.353531529	0.339921735	0.013609794	0.1844	0.4453	1.0255	-0.2189	0.3282	0.3029	1.2863	0.7715	-0.4739	0.1203	0.2662
10191	-0.337574343	-0.265271773	0.07230257	0.626839331	0.778410266	-0.151570935	0.672	0.7683	2.4994	1.5886	0.6661	1.3822	2.4426	1.918	1.6475	1.1712	1.0873
10192	1.259456742	0.648258834	-0.611197907	0.363714594	0.119461944	0.24425265	0.6306	0.5232	0.6089	0.8625	0.8288	0.6609	0.7095	0.4857	0.5413	1.0825	1.3782
10193	0.794363829	0.208180684	-0.586183145	0.321167711	0.149321779	0.171845932	0.2958	0.3144	0.1547	0.2406	-0.1087	0.5815	0.7382	0.4807	0.7402	0.6042	0.6789
10209	0.693382547	0.258674738	-0.43470781	0.241255139	0.142220085	0.099035054	0.2687	0.1388	1.1247	0.8848	0.4086	0.5818	1.3986	1.1624	1.0503	0.845	1.6356
10210	0.41457133	0.12304933	-0.291522	0.651855327	0.536908812	0.114946515	0.3585	0.2356	0.2712	0.3468	0.4305	0.2687	0.317	0.5233	0.3336	0.1508	0.162
10211	0.219202321	0.180173615	-0.039028706	0.623054305	0.59562519	0.027429114	0.0572	-0.1486	-0.187	-0.4228	-0.0411	-1.2217	0.1014	-0.8388	-0.4174	-1.0317	0.1298
10212	0.399900939	0.185357104	-0.214543835	0.584248509	0.449421908	0.1348266	-0.6946	0.4217	0.5919	0.4547	0.1818	0.1901	-0.0535	-0.3977	0.3176	0.1028	-0.0843
10213	-0.104621105	0.002463306	0.107084411	0.224784536	0.244012671	-0.019228136	0.3141	0.1763	0.8568	0.6774	0.3663	0.5234	1.0468	0.3362	0.3036	0.6548	1.1977
10232	0.438425835	0.147344129	-0.291081706	0.741414684	0.515114748	0.226299937	0.0694	0.0849	0.3258	0.7541	0.2409	0.2922	0.5374	0.8234	0.9155	-0.0328	0.5585
10233	0.946509907	0.658255399	-0.288254508	0.841552324	0.500964097	0.340588227	0.1181	-0.145	0.4153	0.3345	0.0874	0.0438	0.5309	0.4268	0.0931	-0.0079	0.2787
10234	0.295119481	-0.066502896	-0.361622377	0.411079769	0.280341233	0.130738536	0.2307	0.2073	0.3068	0.2237	0.3284	-0.0323	0.4848	0.53	0.1723	-0.0108	-0.2446
10248	-0.125657827	0.119398678	0.245056505	0.320608813	0.414009692	-0.09340088	-0.0069	0.0122	0.7629	0.6251	0.2339	0.8589	0.9533	0.6535	1.3188	0.3769	1.1321
10249	-0.165469837	-0.278581114	-0.113111277	0.219949144	0.230415011	-0.010465867	-0.401	-0.286	0.6253	0.3077	0.452	-0.2278	0.6829	0.4309	-0.1159	-0.1126	0.4361
10250	0.935061672	0.444491773	-0.490569898	0.907879855	0.535815237	0.372064618	0.6128	0.828	1.6536	1.0819	0.6573	0.7411	1.3031	1.812	1.1166	1.3917	1.5701
10251	-0.115326424	-0.151846125	-0.036519701	0.472122768	0.598252348	-0.12612958	-0.1235	-0.0247	0.4445	0.5386	-0.0761	0.3707	0.3451	0.4359	0.5015	0.0183	0.5914
10285	0.838207413	0.226502808	-0.611704605	0.310778678	0.153821599	0.156957079	0.0253	-0.2413	0.3221	0.5865	0.2561	0.3337	0.5389	0.5972	0.6995	0.4601	0.655
10286	0.84922887	0.405977201	-0.443251669	1.198648226	0.869533327	0.329114899	0.4343	0.1477	0.9014	0.9898	0.2143	0.4679	0.6196	0.4836	1.0669	0.1602	0.6588
10287	0.285311912	-0.050454682	-0.335766594	0.225110404	0.167379046	0.057731358	-0.2149	-0.3288	0.2838	0.1976	0.4235	0.0857	0.7759	0.4924	-0.1692	0.1753	-0.0017
10288	0.338615906	-0.104956331	-0.443572237	0.312377285	0.239687392	0.072689893	0.0949	-0.0135	-0.0075	0.6685	0.4673	0.2231	-0.0926	0.5057	-0.1191	0.4703	0.1766
10289	0.413943699	-0.048722292	-0.462665991	0.335990217	0.192477573	0.143512644	0.0316	0.3162	0.6876	0.8269	0.4281	0.4569	1.1149	1.2164	0.7749	0.3057	1.019
10307	1.601204688	0.69406933	-0.907135358	0.897176799	0.256271991	0.640904808	0.2164	0.3812	1.3728	1.4489	0.565	1.1307	1.6036	2.1461	1.7607	1.061	1.3796
10308	0.60481454	0.3627053	-0.24210924	0.504200977	0.367356512	0.136844465	0.2911	0.5691	1.2308	0.5206	0.488	1.567	1.235	1.0771	2.0006	1.4176	0.9941
10309	1.348421988	0.630117453	-0.718304535	0.657715794	0.321135741	0.336580053	0.7306	0.4724	1.9701	0.9783	0.6491	0.9498	1.1088	1.2703	0.6254	1.1377	0.4753
10325	1.043594275	0.353540018	-0.690054257	0.624621201	0.228752949	0.395868252	0.3913	0.3438	0.3508	1.1095	0.8425	0.1965	0.5525	0.7365	0.2834	0.1076	1.2565
10326	0.582293362	0.069871813	-0.512421549	0.6161703	0.385329517	0.230840783	0.4826	-0.1467	0.1353	0.8788	-0.2901	-0.1212	0.8755	0.4686	-0.08	-0.3866	1.2839
10327	1.16618538	0.285305317	-0.880880064	0.749327321	0.257403023	0.491924299	0.4067	0.6351	1.2914	1.1553	0.75	1.0654	1.3321	1.888	1.2689	0.914	1.1918
10328	0.469328413	0.234625483	-0.23470293	0.472785147	0.351913762	0.120871385	0.0231	-0.0125	0.2711	0.7188	-0.024	0.5257	0.6299	0.4538	0.4746	1.5581	0.3714
10329	0.930786288	0.435705694	-0.495080594	0.596793585	0.261519948	0.335273636	0.3641	0.2443	0.83	0.694	0.3524	0.0316	0.5132	0.7701	0.2578	0.6039	0.629
10335	0.3857945	-0.01166318	-0.397457681	0.773487498	0.589706592	0.183780907	0.5419	0.414	1.5354	1.1267	0.4427	0.6505	1.4275	0.6442	1.5756	0.6761	2.1632
10339	0.451088092	-0.041608168	-0.49269626	0.352164465	0.212514794	0.139649671	0.1377	0.3907	0.5428	0.5325	-0.0219	0.3948	0.3222	0.8853	0.5442	0.3743	0.8016
10340	0.110715224	-0.150442925	-0.261158149	0.265490179	0.213660987	0.051829192	0.0062	0.1497	0.7282	0.3241	0.3575	0.28	0.764	0.6627	0.2473	0.2594	0.3551
10341	0.897990399	0.330940883	-0.567049516	0.686670831	0.321879518	0.364791313	-0.6991	-0.5384	-0.2246	0.0866	-0.3075	-0.343	-0.0545	0.3023	-0.3615	0.0648	0.1021
10342	1.119378716	0.531014131	-0.588364586	0.809273657	0.48471367	0.324559988	0.2937	0.0815	0.6349	0.8469	0.1394	0.3483	0.5733	0.6541	0.4031	0.1882	0.8304
10343	0.432682886	0.017128411	-0.415554475	0.254293753	0.127451244	0.126842509	-0.0058	0.1401	0.2021	0.1223	0.2523	0.0355	-0.0027	-0.007	0.4759	-0.0618	0.0932
10365	0.412931028	0.014670903	-0.398260125	0.207703253	0.148776293	0.05892696	0.3695	0.2466	0.2407	0.2378	0.2934	0.1115	0.459	0.7613	-0.0706	0.3135	0.2502
10366	0.215823547	0.173045387	-0.04277816	0.191670873	0.148045654	0.04362522	0.2457	0.2066	1.119	0.9766	0.2275	0.3583	0.9728	0.7559	0.5583	0.3905	0.6017
10367	0.024008929	-0.275006936	-0.299015865	0.326531937	0.312071984	0.014459953	0.2684	0.0534	0.6157	0.3572	0.1254	0.1151	1.1576	0.7632	0.26	0.2582	0.5779
10368	-0.197567034	-0.029568912	0.167998121	0.4323511	0.545280884	-0.112929784	0.3798	0.4075	0.1474	0.066	0.1531	0.1185	0.2699	0.2806	0.1701	0.2436	0.1912
10385	1.361621046	0.613600228	-0.748020817	1.136628381	0.581688396	0.554939985	0.439	0.4719	0.637	0.6245	0.5506	0.4219	0.4075	0.528	0.1938	0.374	0.8744
10386	1.349482859	0.649654568	-0.699828291	0.788334548	0.344026315	0.444308233	0.4278	0.3819	0.9322	0.9604	0.8886	0.6432	1.5432	0.5621	2.5012	0.5298	0.7797
10387	0.622298042	0.241847648	-0.380450394	0.342991768	0.185494992	0.157496776	-0.0341	0.2574	0.7187	0.8832	0.3378	0.3902	0.6301	1.164	0.0784	0.1946	0.8254
10388	1.472587019	0.928790066	-0.543796953	0.513566899	0.20524547	0.308321429	1.7292	0.9916	0.6883	1.7269	0.9105	0.4094	0.7748	0.8083	0.023	0.5233	-0.3977
10413	0.708195137	0.453654929	-0.254540208	0.62578038	0.406193481	0.219586899	-0.9719	-0.1262	0.452	0.7655	-0.0618	0.4617	0.8935	-0.3584	0.0107	0.1598	0.5019
10414	0.205172904	-0.14346041	-0.348633314	0.568671166	0.456072836	0.11259833	0.2898	0.6743	0.1912	0.5001	0.7792	0.2901	0.7953	0.9188	0.3739	0.3581	0.9561
10415	0.822182426	0.227015028	-0.595167398	0.978976786	0.615670741	0.363306045	0.6613	0.195	1.0709	1.1287	0.2867	0.3112	0.3294	1.0332	0.5594	-0.022	1.2407
10435	0.459916688	0.115829462	-0.344087226	0.38034781	0.299900263	0.080447547	0.4121	0.1851	0.8656	0.296	-0.0059	-0.1362	0.1964	0.6933	-0.2878	0.3498	-0.3373
10436	1.045977721	0.588962773	-0.457014948	0.512941579	0.377279792	0.135661787	0.173	0.0985	0.6252	0.6357	0.4642	0.3055	0.8318	0.7614	1.1632	0.2315	1.7415
10437	1.361621046	0.613600228	-0.748020817	1.136628381	0.581688396	0.554939985	0.2514	0.3738	0.6045	0.3777	0.2913	0.156	0.6202	0.3551	0.0718	0.8869	0.1936
10438	1.414622009	0.837126192	-0.577495816	0.92585581	0.498774516	0.427081294	0.2232	0.3789	0.7693	0.8374	0.4593	0.5412	1.268	0.3685	0.5294	1.2118	1.593
10439	0.707096252	0.395891079	-0.311205173	0.141616586	0.11698782	0.024628766	0.2032	0.3744	0.8497	0.3598	0.7045	0.0819	0.3515	0.5152	1.3765	0.5267	0.2016
10478	0.439067426	0.19616156	-0.242905866	0.358580607	0.320212073	0.038368533	0.7802	0.4387	1.4027	0.6518	0.5228	0.5539	1.5228	0.6694	0.549	0.7661	0.8096
10479	0.733141534	0.285420119	-0.447721415	0.679208295	0.550547865	0.12866043	0.4419	0.3793	0.7049	0.6579	0.4543	0.2299	0.2997	0.2778	0.3381	0.0805	0.0535
10480	1.064407207	0.540447668	-0.523959539	0.782293754	0.428310681	0.353983073	0.2889	-0.2362	0.6818	1.371	0.577	0.3374	1.4245	1.1025	0.1508	0.4389	1.6629
10481	0.384160983	0.183321807	-0.200839175	0.577825168	0.507762356	0.070062812	0.1018	-0.0481	1.0054	0.5572	0.2172	0.2684	0.5963	1.1104	0.0004	0.4373	0.2343
10483	0.055419041	-0.234408433	-0.289827474	0.366576971	0.308993427	0.057583544	0.4351	0.4723	1.2643	0.3777	0.6328	0.4439	1.1431	0.4206	0.2314	0.398	1.1545
10520	-0.200470351	-0.327045482	-0.126575132	0.358980239	0.415576296	-0.056596058	-0.024	-0.045	0.209	-0.0985	-0.054	0.2409	0.5069	0.1698	0.3178	0.4351	0.346
10521	0.514399667	0.212626684	-0.301772983	0.398906347	0.258442182	0.140464165	0.1767	0.6229	0.5139	0.8815	-0.1866	0.02	0.6732	0.1767	1.2656	1.17	0.8161
10536	0.766330923	0.246493993	-0.51983693	0.547804513	0.328802391	0.219002121	0.4527	-0.0398	0.4762	0.1901	0.197	0.2079	0.491	0.4987	0.63	0.3561	0.3115
10537	1.067359212	0.555204776	-0.512154436	0.609100153	0.302010886	0.307089267	0.0869	0.0761	0.5811	0.3994	-0.2054	-0.0138	0.2581	0.286	-0.1865	0.3438	0.1121
10538	0.65572914	0.334540954	-0.321188187	0.467930125	0.281736089	0.186194036	0.2228	0.2581	0.6969	0.538	0.2963	0.5591	0.5059	0.6546	0.5847	0.2651	0.3919
10539	0.178279297	-0.215850063	-0.39412936	0.187871582	0.133487847	0.054383735	0.0315	0.1687	1.0674	0.877	0.504	0.2196	0.2788	0.8246	0.1914	0.1611	0.5872
10540	0.846813123	0.305126411	-0.541686712	0.681955475	0.301014239	0.380941236	0.3207	0.0169	0.8215	0.4006	0.1775	0.0242	0.6318	0.4735	0.6347	0.3724	0.3234
10556	0.828799379	0.334170534	-0.494628846	0.587985429	0.275856283	0.312129146	0.4441	0.4245	0.8509	0.5201	0.5105	0.2421	0.7282	0.6347	0.4045	0.0861	0.6512
10557	0.935194758	0.515180864	-0.420013895	0.514752982	0.280337902	0.23441508	1.0784	1.4344	1.2033	0.8679	0.5979	0.8394	0.9235	0.597	0.9956	1.0215	1.93
10558	-0.277870491	-0.305683838	-0.027813346	0.319436644	0.375368895	-0.055932251	0.3772	0.569	0.889	0.4032	0.2285	0.7551	1.3536	0.5772	0.2762	0.2817	0.5741
10559	0.839114473	0.391371937	-0.447742536	0.467171701	0.264987723	0.202183978	0.2659	0.5712	1.1618	0.8084	0.8691	0.7674	0.7671	0.7183	0.4663	0.5796	0.8987
10560	0.625475867	0.333810653	-0.291665214	0.510171058	0.35782452	0.152346538	0.4776	0.6103	0.8058	0.7901	0.8006	0.6285	0.9197	0.7316	1.3585	1.0443	-0.0979
10565	0.111263742	-0.129761408	-0.24102515	0.336184859	0.302887121	0.033297738	0.207	0.1727	0.6474	0.0463	0.4021	0.2381	0.4031	0.4394	0.0988	0.27	0.4373
10566	0.962234267	0.434783759	-0.527450508	0.887984415	0.631798166	0.256186249	0.3621	0.6327	1.2912	0.8977	0.5285	0.5893	0.8032	0.7514	0.9857	0.3222	1.0533
10567	0.773764059	0.462393943	-0.311370115	0.174020469	0.133729667	0.040290802	0.0176	0.2592	0.9496	0.5918	0.2633	0.6075	1.3235	0.9525	0.3219	1.2008	0.9687
10568	-0.480735238	-0.265669474	0.215065764	0.136981921	0.139546894	-0.002564973	-0.3406	0.1532	-0.0459	0.1469	-0.0663	0.0832	-0.4962	0.1139	-0.1704	-0.3537	0.2152
10569	0.399342683	0.108310216	-0.291032468	0.455609305	0.321276872	0.134332434	0.0109	-0.1382	0.5103	0.2668	-0.0242	0.4427	0.5589	0.5542	0.0328	0.6365	0.2201
10636	1.102808813	0.568826902	-0.533981911	0.751187452	0.438020735	0.313166717	0.9403	1.0376	2.3965	1.5625	0.6619	1.8483	1.9012	1.9506	2.0455	1.8963	1.5272
10637	0.586598473	0.3131297	-0.273468774	0.463998624	0.327148235	0.136850389	0.7323	0.6818	0.981	1.5427	0.0656	0.1985	1.023	0.3951	0.6345	0.6145	1.1651
10638	0.964376057	0.345773696	-0.618602361	0.56795162	0.199574918	0.368376702	0.1468	0.0065	0.3219	0.5433	0.2084	0.5064	0.429	0.8625	0.7086	0.4872	0.9596
10639	0.599095634	-0.081213691	-0.680309326	0.551855164	0.367616588	0.184238576	1.2609	0.9317	1.7533	1.0343	0.9576	0.8587	1.3758	1.0764	0.4147	0.5109	0.7886
10640	0.923331813	0.34668132	-0.576650493	0.846718507	0.444390751	0.402327756	0.2645	0.2757	0.7082	0.6293	0.6124	0.4965	1.2545	0.4009	0.7124	0.7668	0.4625
10677	0.91633676	0.156748984	-0.759587776	0.401870365	0.208131939	0.193738426	0.7915	0.9136	2.1005	0.6255	0.5357	0.9351	1.0054	1.0169	0.9284	1.0324	0.8591
10678	0.419418169	0.099584791	-0.319833378	0.386830346	0.238136063	0.148694283	0.4983	0.4533	0.4148	0.4745	0.4948	0.2691	0.9298	0.3803	0.6997	0.168	0.5152
10679	1.005301832	0.359025062	-0.64627677	0.854074743	0.431915978	0.422158765	2.5621	1.6582	3.2976	1.8092	0.9508	1.3126	1.7834	2.4615	3.8083	1.2768	2.8913
10680	-0.267009466	-0.077259549	0.189749917	0.480529853	0.646777918	-0.166248065	0.1641	-0.217	0.3327	0.2156	-0.1183	0.127	-0.0911	0.1218	0.2004	0.0327	0.1434
10692	0.571499367	0.009709427	-0.56178994	0.886020897	0.698010667	0.18801023	0.3927	0.4842	0.6332	0.3509	0.5376	0.3605	0.4755	0.1407	0.4687	0.7674	0.9178
10693	0.549823815	0.121514527	-0.428309288	0.747819899	0.599071181	0.148748718	0.1852	0.244	0.3494	-0.0289	0.1055	0.3535	0.4544	0.2157	0.4642	0.3383	0.3724
10694	0.862519009	0.256038394	-0.606480615	0.678609997	0.41492834	0.263681658	0.1866	0.2834	0.257	0.2986	0.4227	0.1725	0.2214	0.575	-0.1273	0.0538	-0.05
10711	0.419520055	-0.059235416	-0.478755471	0.320351512	0.126467778	0.193883734	0.3008	0.0954	1.0184	0.8613	0.2635	0.7544	0.7432	0.555	0.373	0.3713	0.9268
10712	1.372141666	0.524968657	-0.847173009	0.913736216	0.53829866	0.375437556	0.3828	0.6023	0.9047	0.8678	0.6321	0.6846	1.0238	0.8055	0.7948	0.5207	1.1914
10713	0.827395593	0.259308172	-0.568087421	0.545662815	0.266567546	0.279095269	0.4298	0.3526	1.3076	0.6908	0.2733	0.7478	0.8413	0.4564	0.261	1.4623	0.7227
10714	0.987461966	0.355637106	-0.63182486	1.042423221	0.612759764	0.429663458	0.1905	0.4235	0.8537	0.8101	0.281	0.2458	0.8873	0.7741	0.8286	0.4002	1.5438
10715	1.248117195	0.527940291	-0.720176904	0.566913446	0.300211156	0.26670229	0.4848	0.551	1.2225	1.2473	0.491	0.5088	0.6839	1.118	0.5623	0.7195	1.3877
10716	0.585573147	0.106562851	-0.479010296	0.34925438	0.216871803	0.132382576	-0.2315	0.0805	0.52	0.4685	0.4485	0.2419	0.7715	0.6383	0.1945	0.3989	0.6251
10738	0.867589339	0.365085605	-0.502503734	0.424399929	0.228454762	0.195945167	0.4406	0.3199	0.7963	0.1212	0.2118	0.3079	1.1195	0.5307	1.1126	0.51	-0.3146
10739	0.840135753	0.367884723	-0.47225103	0.754594749	0.514514338	0.240080411	0.4516	0.4521	0.7205	0.6233	0.4989	0.3211	0.8185	0.6032	0.6422	0.3335	1.0138
10740	0.307442888	0.031625532	-0.275817356	0.502198896	0.407638128	0.094560769	0.2207	0.3743	0.4045	0.2513	0.3187	0.1599	0.3815	0.4401	0.19	-0.0468	0.0804
10750	0.6224347	-0.011068365	-0.633503065	0.744862002	0.517521231	0.227340771	0.135	0.2932	0.3592	0.28	0.3712	0.3502	0.3572	0.4865	0.507	0.6628	0.5135
10752	-0.074191015	-0.169891735	-0.095700721	0.354818148	0.341543788	0.01327436	0.291	0.0401	0.3715	0.2848	0.0422	0.242	0.6734	0.2096	0.1575	0.3644	0.3356
10753	1.415964649	0.589220055	-0.826744594	0.78243646	0.361883239	0.420553221	-0.0522	-0.0942	0.4149	0.1311	0.2145	0.2779	0.3857	0.6709	0.4178	0.3672	0.2762
10772	-0.108137568	-0.198709605	-0.090572037	0.323602468	0.317704438	0.005898031	-0.3716	-0.3505	0.0405	0.3091	-0.4447	0.0241	0.0385	0.2497	0.0137	-0.3905	-0.0302
10773	1.386968708	0.740605856	-0.646362851	0.82092613	0.34665409	0.47427204	1.1267	0.9127	1.2883	0.7849	0.884	0.7218	1.0335	0.8628	1.1571	0.4602	0.8533
10775	0.396245516	-0.041588524	-0.437834039	0.447991831	0.267527978	0.180463854	0.3799	0.2602	0.8537	0.6974	0.303	0.5689	0.5538	0.477	0.4812	0.2128	0.1313
10790	-0.015908727	-0.052621173	-0.036712446	0.136257159	0.13592332	0.000333838	0.1423	0.2398	1.0069	0.9482	0.3774	0.6781	0.717	0.9106	1.0017	0.0475	-0.2222
10791	1.199991872	0.579870985	-0.620120886	0.341718907	0.199594606	0.142124301	0.218	0.2664	0.9037	0.8315	0.3959	0.42	0.8707	1.4587	1.1561	0.6247	0.8345
10792	1.386398764	0.710120144	-0.67627862	1.194069064	0.530268457	0.663800607	0.9629	0.8816	0.8478	1.2268	0.6396	1.5907	1.6436	1.3391	0.5895	0.7139	0.4724
10793	0.376942618	0.133707161	-0.243235457	0.558740303	0.419718647	0.139021656	0.3833	0.289	0.4763	0.5156	0.2414	0.582	0.6568	0.6254	0.2901	0.0776	0.0602
10794	0.232360562	-0.199245174	-0.431605736	0.423124405	0.374227936	0.048896469	0.3003	0.1518	0.836	0.1722	0.1417	0.5734	0.4164	0.6873	1.5656	1.3972	0.9977
10812	0.533503974	0.107644079	-0.425859895	0.619594885	0.44029637	0.179298515	0.1328	0.2559	0.8683	0.0656	0.2975	0.6188	0.8656	1.1304	0.6859	0.2603	0.5192
10813	1.186210597	0.471938919	-0.714271678	0.978847535	0.500765423	0.478082112	0.1255	0.1483	0.7261	0.8641	0.3094	0.3893	0.6633	0.3556	0.2525	0.6217	0.4815
10815	0.13999593	-0.110190647	-0.250186578	0.730763084	0.619422564	0.11134052	0.2724	0.2373	0.9595	1.3532	-0.1837	0.4154	1.8886	0.7863	0.0433	0.8906	0.5911
10834	1.011156891	0.501449951	-0.50970694	0.734350577	0.421221307	0.31312927	1.1177	0.8228	1.3561	1.4386	0.901	0.4867	1.3553	0.573	1.7412	0.8717	1.9451
10835	0.501206372	0.013252204	-0.487954168	1.091539556	0.941822699	0.149716857	0.5586	1.5797	1.842	1.0355	0.1818	0.5951	2.7436	2.3536	1.855	0.7861	1.4209
10836	0.325434764	0.16783965	-0.157595114	0.797188008	0.743651665	0.053536343	0.2916	0.2909	0.3424	-0.1882	0.3866	0.0376	0.4747	0.1106	0.6421	-0.4289	0.3887
10837	1.325283397	0.695496044	-0.629787353	0.860402548	0.409329026	0.451073521	0.5954	0.8127	1.7174	0.7122	0.4103	0.3468	0.8012	0.474	0.823	0.4049	0.5489
10838	0.543574792	0.075292812	-0.46828198	0.552646078	0.304496151	0.248149926	0.3333	-0.1426	0.4951	0.1191	0.2256	0.3686	0.4409	0.9154	0.1327	0.4689	0.0987
10843	1.078648252	0.48238093	-0.596267322	0.443414992	0.211408265	0.232006727	0.2588	0.3732	0.9342	0.6515	0.3816	0.2613	0.5108	0.8707	0.7084	0.4259	0.5633
10844	1.519791678	0.609887089	-0.909904589	0.327462353	0.196678211	0.130784142	0.8835	0.6864	1.3532	0.6364	0.6212	0.485	1.1925	0.7686	0.5144	0.5784	0.9013
10845	0.746783929	0.153713973	-0.593069955	0.816293006	0.421621759	0.394671246	0.2236	0.391	0.5097	0.4579	0.5133	0.2901	0.9741	0.4768	0.2955	0.413	0.7125
10872	1.544288025	0.693179526	-0.851108499	1.186104918	0.441484813	0.744620104	0.2166	-0.1793	1.5209	0.7156	0.5142	0.851	1.2703	1.1729	0.4844	0.5235	1.4603
10873	1.033770979	0.404648908	-0.629122071	0.846082269	0.405516092	0.440566176	0.3011	0.0636	0.9409	0.5694	0.2957	0.7509	1.2749	1.0219	0.6229	0.6033	0.4266
10874	1.206363651	0.446108232	-0.760255419	0.734248165	0.476231313	0.258016852	-0.0651	-0.4887	0.2751	-0.0599	0.0428	-0.0078	-0.0338	-0.0826	-0.2678	-0.1942	-0.1896
10875	0.455753415	0.149750593	-0.306002822	0.574869661	0.428888087	0.145981574	0.063	0.1368	1.9727	0.6818	0.5304	0.412	1.2319	1.2138	0.8739	0.2447	0.7462
10896	0.172260406	0.003718268	-0.168542138	0.27663153	0.245663058	0.030968471	0.6196	0.58	0.2769	0.1546	0.4874	0.472	0.4503	-0.0332	0.1816	0.1963	0.4781
10897	0.488079121	0.115285644	-0.372793477	0.783463973	0.589979438	0.193484535	0.1505	-0.0697	0.4833	0.2414	0.1519	0.3525	0.4475	0.6931	0.1175	0.4951	0.0892
10898	0.512041004	0.027405473	-0.484635531	0.361807165	0.194962859	0.166844306	0.1984	0.1251	0.6065	0.6061	0.1348	0.4207	0.8541	0.876	0.3666	0.6924	0.2236
10905	0.761369297	0.194306568	-0.56706273	1.063860086	0.721144166	0.342715919	-0.0996	-0.2288	0.5587	-0.0239	0.0879	0.022	0.0861	-0.3308	-0.4937	-0.1821	0.065
10906	1.11347848	0.46958595	-0.643892529	0.787911179	0.450029093	0.337882085	-0.2975	-0.4056	0.4809	0.3071	0.3528	0.3103	0.013	0.4861	0.266	0.3846	-0.0062
10907	0.898638117	0.167944496	-0.730693621	0.69226337	0.25806602	0.43419735	0.0036	-0.211	-0.0948	0.3083	0.0792	0.1758	0.0922	0.3352	0.0413	0.1658	0.2628
10924	1.097167679	0.366568058	-0.730599621	1.166119157	0.681791438	0.484327719	-0.0605	-0.0073	0.948	0.6348	0.5516	0.5736	0.9324	0.5237	0.5354	0.3149	0.5777
10925	1.001623186	0.4406943	-0.560928886	0.723747714	0.345561471	0.378186243	-0.0841	-0.4031	0.9843	1.329	0.3541	0.9247	0.3422	0.934	0.6852	0.3574	1.0356
10926	1.022628948	0.455484946	-0.567144002	0.634907343	0.407799718	0.227107625	0.3407	0.0424	0.0317	0.2236	0.2174	0.2604	0.3394	0.0272	0.3978	0.1084	-0.0615
10927	1.420963485	0.48652359	-0.934439895	1.101003151	0.540678898	0.560324253	0.4193	0.3284	0.4706	0.5082	0.565	0.551	1.3468	0.6458	0.6466	0.692	0.7001
10937	-0.066201138	-0.46522802	-0.399026881	0.350683584	0.384042813	-0.033359229	-0.2651	-0.4034	0.1969	0.1228	0.0696	0.1543	0.2216	0.2238	0.1394	0.2214	-0.2359
10938	0.952790141	0.568552531	-0.38423761	1.338944427	0.960175566	0.378768861	0.5957	0.2914	2.0021	2.1382	0.2961	0.5246	1.2203	0.6351	1.208	0.668	0.8645
10939	1.015821523	0.466644673	-0.54917685	1.258315075	0.797632776	0.460682299	0.37	-0.0201	1.201	0.6899	0.2868	-0.1975	0.1768	0.6943	0.7342	-0.2344	0.3321
10940	0.598322816	0.199339341	-0.398983476	0.76356858	0.502285059	0.261283521	0.5836	0.5597	0.9004	0.3881	0.7789	0.5357	0.7038	0.622	0.344	0.3392	0.9384
10970	-0.09484624	-0.287861865	-0.193015625	0.61420782	0.660985569	-0.046777749	0.6708	0.2818	0.853	1.0781	0.5469	0.2644	1.0524	1.9561	0.4859	0.2769	1.3118
10971	0.753344988	0.377935083	-0.375409905	0.293395556	0.175976351	0.117419205	0.2274	-0.0143	0.5231	0.3268	0.2248	-0.131	0.5295	0.8914	-0.2004	0.2043	0.3071
10972	0.613441404	0.063186277	-0.550255128	0.81030039	0.664709495	0.145590895	0.6455	0.2421	0.8335	0.573	0.1924	-0.4008	0.0231	0.2278	0.4597	-1.3769	-0.6816
10974	0.431406859	-0.014200211	-0.44560707	0.187545808	0.123822564	0.063723244	0.9927	1.5719	0.7466	1.2171	0.259	0.7508	1.2381	0.495	0.8846	1.5943	1.7883
10975	0.130933491	-0.280014871	-0.410948363	0.204913303	0.173141137	0.031772166	0.2669	0.0619	0.1679	0.2034	0.059	0.075	0.2385	0.5691	0.3244	0.1675	0.0985
10976	0.543629799	0.373622252	-0.170007547	0.303066004	0.198406593	0.104659411	0.3192	0.1568	0.2534	0.4137	0.0115	0.6063	0.2061	0.3273	0.579	0.1455	0.3493
10977	0.002034342	-0.226415366	-0.228449708	0.521595914	0.518604725	0.002991189	0.4197	0.2947	-0.0073	0.1804	0.1871	0.2016	0.1671	-0.053	0.1803	0.1231	0.3378
10978	-0.113452944	0.095444304	0.208897248	0.491105331	0.562430498	-0.071325166	0.5878	0.1765	0.8211	0.3634	0.3865	0.2151	0.8166	1.6177	0.4746	0.2011	0.4053
10979	0.647469421	0.163736775	-0.483732646	0.471585817	0.288214018	0.183371799	0.3324	0.2568	1.0485	0.6255	0.3109	1.0613	1.0463	1.0822	1.3739	0.7333	0.5771
10980	0.27183019	-0.157827578	-0.429657768	0.463239971	0.330480161	0.13275981	0.9437	0.6373	1.3444	1.0794	0.7044	0.4584	1.2498	0.7368	0.3739	0.114	0.9331
10984	0.78080569	0.449944071	-0.330861619	0.617144414	0.397126642	0.220017772	0.5259	0.598	1.3012	1.2682	0.4826	0.5363	1.0051	1.1836	0.4932	0.7401	1.215
10985	0.873836166	0.498062353	-0.375773813	0.612804785	0.389375035	0.22342975	0.2677	0.4751	0.7124	0.3565	0.3112	0.3313	1.0919	0.8942	-0.1417	0.2373	1.2763
10993	0.582702822	0.139917458	-0.442785364	0.809626679	0.580117592	0.229509087	0.1535	0.1043	0.9281	1.1537	0.1546	0.0051	0.6084	0.6252	0.6235	0.3634	1.3694
10994	0.315792104	-0.035266712	-0.351058816	0.299705919	0.215113223	0.084592696	0.1861	0.2399	0.781	0.2287	0.1092	0.2209	0.4003	0.7755	0.509	0.6754	0.8751
10995	0.776180239	0.479563648	-0.296616591	0.58529465	0.250371623	0.334923027	0.5507	0.4294	1.0276	0.649	0.2424	0.7669	0.9959	1.3071	0.1398	0.7977	1.6533
10996	0.289661573	0.02593185	-0.263729723	0.216018028	0.160431883	0.055586145	-0.3011	-0.1881	0.7667	0.4512	-0.1828	0.0166	0.4901	0.4341	0.1637	0.4642	0.8842
10997	0.151665522	-0.265291692	-0.416957214	0.237374348	0.173321626	0.064052722	0.6282	0.3472	0.5355	0.8089	0.3311	0.5123	0.6036	0.8428	0.027	0.1032	0.455
11007	0.163943672	-0.284397618	-0.44834129	0.386282691	0.309956049	0.076326643	0.8408	0.6313	0.1776	0.4529	-0.0524	-0.07	0.9335	-0.1952	0.1458	-0.2286	0.4279
11008	0.539616325	0.251637691	-0.287978634	0.602572918	0.386521686	0.216051232	0.5175	0.6135	0.9616	0.7582	0.4079	0.21	0.6678	0.6492	0.434	0.245	0.8779
11009	-0.041274014	-0.275563192	-0.234289179	0.16977085	0.166361941	0.003408908	0.3101	0.3528	0.4948	0.1799	0.1512	0.2504	0.0419	0.109	1.3995	0.2067	0.4415
11010	0.626382272	0.362236317	-0.264145955	0.23522431	0.144031089	0.091193221	0.8584	0.8585	0.7116	1.1982	0.3231	0.3943	1.5518	0.9327	1.1107	0.3313	1.0995
11029	1.041168998	0.549211294	-0.491957704	1.166017437	0.714522592	0.451494846	-0.0103	0.357	1.0292	0.8941	0.1272	0.2109	0.8956	0.7337	0.3361	0.8949	0.5969
11030	0.595390511	0.362623898	-0.232766613	0.530399951	0.344753338	0.185646613	0.8095	0.5845	1.0382	0.5309	0.6878	0.8	1.0374	0.7953	0.1444	0.7302	1.0517
11031	1.391806686	0.508680711	-0.883125975	1.056643826	0.505579439	0.551064387	1.319	0.6164	1.7648	0.6973	0.4811	1.9392	1.6009	0.8199	1.3655	1.1948	1.9518
11046	0.42938109	-0.016925001	-0.446306091	0.414845819	0.227282271	0.187563548	0.0989	0.0725	1.0289	0.62	0.2308	1.9886	1.3815	1.3576	0.687	1.286	0.8696
11047	1.305602029	0.609091451	-0.696510578	1.313250109	0.798417354	0.514832755	0.2142	0.1672	1.6416	1.6498	0.4668	1.2113	1.1928	2.5192	0.8592	0.773	0.4307
11048	0.557786316	0.057836739	-0.499949577	0.556729023	0.314283541	0.242445482	0.1263	0.3051	0.4002	0.1999	-0.0681	0.1288	0.321	0.3702	0.1142	0.2172	0.9403
11066	1.554826473	0.700947116	-0.853879358	0.927738835	0.467679917	0.460058918	0.7862	0.3074	1.3565	1.2915	0.5577	0.4964	1.3973	0.9088	0.8252	0.5534	1.1171
11067	1.218243077	0.492529429	-0.725713648	0.388782512	0.206058196	0.182724316	0.6319	0.4919	0.5573	1.3383	0.7985	1.0204	1.4117	0.7007	0.6866	1.1106	0.8864
11068	1.426221929	0.48614557	-0.940076359	0.764408657	0.222217526	0.54219113	0.8793	0.7106	2.1705	1.1986	0.3293	0.3718	2.0175	1.9721	1.9751	0.854	1.8792
11137	0.461188274	0.198863512	-0.262324762	0.724205643	0.557850837	0.166354806	0.0084	0.1591	0.5227	0.3425	0.1655	0.216	0.9515	0.5891	0.6861	0.5116	0.8329
11138	0.12760348	-0.202200026	-0.329803506	0.575432064	0.54261339	0.032818673	0.1188	0.3043	0.77	0.8278	0.1593	0.3422	0.6368	0.6837	0.2649	0.222	0.4939
9389	0.98846545	0.611306896	-0.377158553	0.188351478	0.130922439	0.057429038	-0.6893	-1.0273	0.3438	-0.2797	-0.6518	0.1742	0.0944	-0.5427	-0.3699	-0.078	-0.1715
9390	1.068010924	0.387649605	-0.680361319	0.522075681	0.28943127	0.23264441	-0.5792	-0.3499	-0.2375	0.742	-0.3758	0.0913	0.1557	0.3075	0.5057	-0.1878	0.4509
9391	0.221392887	0.264636625	0.043243738	0.313426405	0.227752458	0.085673947	0.2174	0.2331	0.767	0.6589	0.3209	0.3739	0.8947	0.3897	0.5318	0.3271	0.7733
9398	-0.40424544	-0.215201249	0.189044191	0.098982707	0.103526967	-0.004544261	-0.0567	-0.1679	0.1822	0.3657	-0.0734	-0.1825	-0.0821	0.3718	0.1035	0.0346	0.3849
9399	0.486247656	0.318155698	-0.168091958	0.223682377	0.149472311	0.074210066	0.2535	0.1891	0.3095	0.3983	-0.0232	-0.0026	-0.0811	0.3652	0.328	0.8105	0.3981
9400	0.315104138	-0.084255163	-0.3993593	0.351466882	0.269608137	0.081858745	0.352	0.1571	0.7653	0.571	0.4522	0.2845	0.3331	0.5184	0.3109	0.3136	0.6881
9401	0.17746419	-0.004275692	-0.181739882	0.24057335	0.215156103	0.025417247	-0.7279	-0.4652	0.2582	0.2579	-0.3733	-0.1261	-0.0742	-0.1906	-0.0021	-0.6337	0.2117
9426	0.766654293	0.435729139	-0.330925155	1.001760781	0.629415258	0.372345524	0.1199	0.1193	0.2315	0.2207	0.2406	0.2764	0.0604	0.181	0.1348	0.5591	0.1686
9428	1.15673003	0.652582306	-0.504147724	0.410004756	0.198506073	0.211498683	0.2695	0.4803	0.8707	0.5739	0.5518	1.0184	0.6846	0.4896	2.098	0.6217	1.3097
9429	0.887240325	0.46876083	-0.418479495	0.856167413	0.637352696	0.218814717	0.4209	0.5742	1.2837	0.8222	0.529	1.2626	1.4178	1.2765	1.2163	0.7462	0.7672
9430	1.520037679	0.710805834	-0.809231844	0.855022967	0.409079867	0.4459431	0.141	0.0229	0.4678	0.7347	0.1073	0.3952	0.482	0.146	0.2772	0.5097	0.4844
9467	0.491637516	0.295545844	-0.196091672	0.292121402	0.241094141	0.051027261	-0.253	-0.2239	0.1736	0.0595	-0.3226	0.204	0.2695	0.2366	0.151	0.6893	-0.144
9468	0.807002325	0.365973894	-0.441028431	0.560279456	0.205564467	0.354714989	0.369	0.1408	0.8707	0.4115	0.4117	0.7067	0.7278	0.252	0.3806	-0.0315	0.2489
9469	0.959987624	0.612364776	-0.347622848	0.159525271	0.106313221	0.05321205	0.7872	0.886	0.9155	0.3676	0.6027	0.6763	1.3378	1.3724	0.594	0.8102	0.7549
9470	-0.192162898	-0.347439148	-0.15527625	0.141565375	0.146780355	-0.00521498	0.3137	0.3726	0.8208	0.581	0.2374	0.1115	0.8629	0.481	0.1181	0.1063	0.96
9495	0.426779552	0.147021732	-0.27975782	0.227773414	0.154173825	0.073599589	0.3899	0.4288	0.2676	0.1137	0.144	-0.0491	0.3032	0.3319	0.0159	-0.0148	0.333
9496	0.10382145	-0.180644171	-0.284465621	0.203513267	0.179310259	0.024203008	-0.3888	-0.4468	-0.4644	-0.6747	-0.1709	-0.0357	-0.4574	0.0924	-0.1846	-0.1132	-0.2393
9497	0.871453817	0.483292943	-0.388160874	0.19869262	0.147485395	0.051207224	0.2724	0.3098	0.1599	-0.0475	0.035	0.1441	0.3216	0.4246	0.079	-0.0412	0.4762
9498	0.726965683	0.149753521	-0.577212162	0.423448124	0.219151875	0.204296249	0.2728	0.3756	0.9117	-0.0246	-0.1088	0.5809	0.5523	1.0073	0.9322	0.334	0.4843
9510	0.238743397	-0.22767298	-0.466416377	0.443264815	0.29120204	0.152062775	0.0677	0.2142	0.0714	0.2847	0.3168	-0.0212	0.4365	0.4197	0.3179	0.2629	0.1254
9511	0.838911842	0.255344131	-0.583567711	0.57970925	0.407243554	0.172465696	-0.2349	-0.2979	-0.3915	-0.3384	-0.2422	-0.5575	-0.2446	0.0186	-0.1136	-0.3994	-0.2521
9512	1.363313345	0.610894845	-0.7524185	1.172362751	0.735336622	0.437026128	0.8594	0.6831	2.216	0.7255	0.9642	0.5604	0.9943	2.0921	-0.5253	0.9056	1.9053
9513	0.483506078	0.261472141	-0.222033937	0.611732825	0.398681334	0.213051491	-0.4678	-0.7441	-0.0035	0.2876	-0.5221	-0.1452	-0.2525	-0.0648	-0.3636	0.653	0.379
9514	0.249359785	0.125687407	-0.123672378	0.137506176	0.12659794	0.010908236	-0.906	-0.8979	-0.5743	-0.693	-0.8503	-0.0995	-0.8227	-0.8898	-0.1138	-0.0472	-0.1899
9538	0.789377639	0.252413082	-0.536964557	0.640476159	0.345305933	0.295170227	0.6192	0.2437	0.7332	0.5438	0.5989	0.6935	0.8217	0.6334	1.4396	0.3073	0.507
9539	-0.114491769	-0.141138366	-0.026646596	0.17723388	0.181420792	-0.004186912	0.1678	-0.1104	0.3797	0.5305	0.3293	0.3059	0.5001	0.0912	-0.1566	0.1033	0.0693
9540	1.08259688	0.474957027	-0.607639853	0.824729118	0.524794517	0.299934601	0.3506	0.4088	0.2131	0.3991	0.2393	0.1435	0.5371	0.4759	0.1799	0.2677	0.4091
9541	0.67859163	0.058563789	-0.620027841	0.538143826	0.345352577	0.192791249	0.4384	0.3833	0.5058	0.5638	0.3047	0.4122	0.6594	0.745	0.4267	0.4861	1.0092
9542	0.867897357	0.373133602	-0.494763754	0.588715207	0.392069356	0.196645851	0.3981	0.85	1.3549	0.9952	0.4429	1.0235	2.0347	0.7523	1.2642	1.3562	1.8584
9576	0.108337654	-0.146773684	-0.255111338	0.230256839	0.209086247	0.021170591	0.3938	0.2587	0.7086	-0.0055	-0.1264	-0.0087	0.2466	0.3495	0.2424	0.109	0.3201
9577	1.465338839	0.716792537	-0.748546302	0.582543433	0.264074463	0.31846897	0.1931	0.3913	0.6777	0.3722	0.316	0.1532	0.6109	1.081	0.2866	0.3358	0.3492
9578	0.770421763	0.457300954	-0.31312081	0.495898178	0.23900133	0.256896849	-0.0665	-0.1373	0.3699	0.2577	-0.1352	0.4226	0.6621	0.2861	0.7874	0.4149	0.2433
9588	0.52493897	0.213026394	-0.311912577	0.596734791	0.395751501	0.20098329	0.2183	0.0574	0.402	0.4202	0.3825	0.2371	0.6145	0.1925	1.4218	0.4137	0.1354
9589	1.276440621	0.618696082	-0.657744538	0.9000868	0.407911198	0.492175603	0.4916	0.5119	0.6727	1.1529	0.7303	0.6197	1.1428	0.8836	0.0957	0.2547	0.8879
9590	0.535912701	0.205539399	-0.330373302	0.590461186	0.42471763	0.165743556	0.0116	-0.4989	-0.1583	0.3786	0.1246	-0.1686	0.0309	0.7127	-0.9528	-0.0326	0.4739
9591	0.315879314	0.201193372	-0.114685942	0.472249026	0.402010425	0.070238602	0.1825	0.189	1.3284	0.0841	0.3379	0.4713	0.477	0.1236	0.2504	0.4666	0.8946
9592	0.605090913	0.121119632	-0.483971281	0.520410123	0.323037605	0.197372518	0.3743	0.0926	0.5941	0.2164	0.3841	0.3524	0.4818	0.3089	0.1746	0.1429	-0.0123
9606	0.528783336	0.078711885	-0.45007145	0.303718142	0.179337607	0.124380535	0.2247	-0.0656	0.36	0.9068	0.1071	0.4909	0.6994	0.5482	0.6624	0.3895	1.377
9607	0.211926363	-0.148736787	-0.360663151	0.254051646	0.203259173	0.050792473	0.2083	0.08	0.2886	0.2289	-0.0757	-0.0123	0.0849	0.1263	0.234	0.2341	0.0225
9608	1.436158072	0.811958661	-0.624199411	0.763242736	0.329515179	0.433727557	1.0496	1.6234	2.024	1.2361	0.5322	0.0525	1.7524	2.031	1.1555	0.8524	1.3787
9610	0.284306251	0.080013836	-0.204292416	0.417871069	0.374695616	0.043175453	0.6486	1.2505	1.1799	1.1346	-0.4853	0.3731	1.2683	1.7773	-0.0851	0.7372	1.0077
9611	0.923416105	0.319365104	-0.604051002	0.707427036	0.467945673	0.239481364	-0.9974	-1.2351	-0.8478	-1.0735	-1.4976	-0.4259	-1.1306	-0.8585	-1.0769	0.3115	-1.2435
9623	1.622000406	0.791059636	-0.83094077	1.34904968	0.813230318	0.535819362	0.4777	0.3673	1.5606	0.8779	0.5361	0.908	1.2331	0.6669	0.6431	0.7501	1.8354
9633	0.159500306	0.082606018	-0.076894288	0.388329618	0.34694603	0.041383588	0.3881	-0.0497	0.8636	0.4637	0.19	0.5241	0.6807	0.4237	0.4709	1.0926	0.2091
9634	0.328197022	0.091014006	-0.237183017	0.200272983	0.154317417	0.045955566	-0.048	0.0173	0.3132	0.8001	0.2179	0.138	0.4829	0.4228	-0.1812	0.3225	0.5352
9635	0.913328339	0.326234886	-0.587093453	0.767231593	0.503405631	0.263825962	-0.1076	-0.1952	0.1219	0.1273	0.1875	0.2036	-0.0275	0.1747	0.4583	0.0315	0.5004
9636	0.573088281	0.251462361	-0.321625921	0.520940079	0.362629662	0.158310417	0.4498	0.4487	0.4122	0.744	0.1477	0.3763	0.8753	0.6249	0.5349	0.657	0.4904
9637	-0.048992519	-0.094776589	-0.045784069	0.558853728	0.555710154	0.003143574	0.3519	0.277	0.0659	0.6673	0.0248	-0.2383	0.351	-0.0535	0.1526	0.0207	0.6761
9644	0.17054275	0.040053071	-0.13048968	0.579341998	0.424013645	0.155328352	0.179	0.2032	0.7077	0.0931	0.0411	-0.0229	0.0157	0.3006	0.2346	0.1298	0.1282
9645	0.470512613	0.041040463	-0.429472151	1.184171233	1.014087575	0.170083658	0.3569	0.4343	0.3061	0.3565	0.1607	-0.0147	0.0911	-0.0195	-0.0194	0.0804	0.7246
9646	0.970259535	0.464046356	-0.506213179	0.699974673	0.491283395	0.208691278	0.3073	0.2051	0.7252	0.6023	0.2875	0.5862	0.5079	0.9961	0.1553	0.1881	0.7031
9647	1.466027326	0.876464121	-0.589563205	1.026094803	0.482312838	0.543781965	-0.2503	0.4291	0.5256	-0.7735	-0.1796	-0.492	0.0346	-0.7027	1.5503	1.3169	0.1974
9657	0.058666802	-0.15738972	-0.216056522	0.492280099	0.408667379	0.083612721	0.1734	0.1822	-0.0401	0.0314	0.2169	0.2421	0.1047	0.1316	0.3428	0.004	0.1517
9658	0.003448817	-0.178256257	-0.181705074	0.62771783	0.62811121	-0.00039338	0.6157	-0.0809	-0.3554	-0.012	0.1906	0.0907	-0.3975	-0.176	-0.1286	-0.0321	-0.4304
9659	0.603345086	0.34043851	-0.262906575	0.444274449	0.300473947	0.143800503	0.3496	0.4012	0.4325	0.2874	0.2745	0.134	0.1961	0.2369	0.4799	0.355	0.1587
9660	1.482892962	0.637930121	-0.844962841	1.277382335	0.526965448	0.750416887	0.1066	-0.0236	-0.2115	0.5243	0.4785	0.2509	0.2428	-0.0173	0.2652	-0.2223	0.2751
9661	0.93711842	0.506297664	-0.430820755	0.532768141	0.291022528	0.241745612	0.2402	0.0872	0.3473	0.4546	0.1533	0.2182	0.2655	0.0676	0.5063	-0.1898	0.5758
9670	0.350899134	0.02174009	-0.329159044	0.638167748	0.534453237	0.103714511	0.1724	0.1791	0.1614	0.273	0.1463	0.0395	0.1256	0.1103	0.252	0.0043	0.1669
9671	0.425363952	0.1857668	-0.239597152	0.759798874	0.614611458	0.145187416	0.6322	0.5641	1.2373	0.8952	0.5833	0.7355	0.9679	0.8498	0.5763	1.0026	0.9873
9672	1.127220036	0.488571029	-0.638649007	0.453197684	0.238867973	0.21432971	-0.0017	-0.2259	-0.0715	0.1058	0.0461	0.0185	0.0971	0.1256	-0.3948	0.0099	-0.3922
9673	0.039704315	-0.118700433	-0.158404749	0.29326089	0.252551383	0.040709508	0.2365	0.1845	0.6177	0.7928	0.5052	0.2824	0.5559	0.3772	0.518	0.3231	0.5505
9674	1.190926952	0.707975526	-0.482951426	1.1153674	0.713431215	0.401936185	-0.3848	-0.749	0.746	1.2889	-0.2997	0.3025	1.0033	0.9271	1.4342	-0.033	0.6038
9688	1.436903377	0.599639513	-0.837263864	1.352892616	0.767436124	0.585456492	0.471	0.0691	1.6884	1.023	0.9327	1.1739	1.5537	1.0947	1.6107	0.9433	1.1028
9689	-0.137918761	-0.247155621	-0.10923686	0.327320252	0.360979087	-0.033658835	0.0482	-0.0526	-0.1382	-0.1132	0.1412	0.0912	0.0739	0.0486	-0.0375	0.0104	-0.0353
9690	0.71180092	0.347084305	-0.364716614	0.216262105	0.126226242	0.090035863	0.1013	0.3047	0.5722	0.4408	0.378	0.387	0.6482	0.3691	0.5682	0.4891	0.5351
9711	1.297996432	0.713535991	-0.584460441	0.637802995	0.284466105	0.35333689	0.4377	0.4046	0.24	0.5233	0.6872	0.0619	0.1928	0.1043	0.6154	-0.2107	0.6065
9712	0.715926034	0.141272316	-0.574653717	0.594249772	0.367570498	0.226679274	-0.2037	-0.1403	0.1943	0.4892	-0.1618	0.5141	0.1032	0.1551	-0.156	-0.384	0.1882
9713	0.114786103	-0.022929	-0.137715103	0.255767246	0.182499946	0.0732673	0.855	0.4242	1.5883	1.9385	0.4584	0.3965	1.2501	0.8943	0.9086	0.7343	0.8104
9714	0.415854981	0.10184904	-0.314005941	0.396242031	0.255449326	0.140792705	0.3528	0.1886	0.8341	0.8504	0.5961	0.5637	0.9025	0.8609	0.9469	0.8588	1.1378
9734	1.177557124	0.515140324	-0.662416799	0.97087267	0.414639913	0.556232757	-0.148	-0.0615	0.5437	0.13	-0.258	0.5747	0.4437	0.619	-0.0288	0.5602	0.637
9735	0.603406708	0.363684606	-0.239722102	0.638106014	0.436458107	0.201647907	0.1196	0.0022	0.3959	0.2941	0.0558	0.0925	0.4505	0.5755	-0.4976	-0.125	0.483
9736	0.617028407	0.396623092	-0.220405316	0.162944753	0.131387152	0.031557601	0.8841	1.0775	0.4863	0.9658	0.689	0.2917	1.0056	0.8114	0.861	0.2606	0.8335
9737	0.134504969	-0.101735032	-0.236240001	0.157970513	0.129382178	0.028588335	-0.0323	0.1016	0.1678	0.3372	0.3768	0.185	0.3719	0.0725	0.2207	0.5363	0.3689
9757	1.047268246	0.586796653	-0.460471592	0.599445125	0.232880698	0.366564428	1.2199	1.0964	1.7435	0.8749	0.8951	0.5106	1.2964	1.7219	0.7482	0.3184	1.0526
9758	0.445304528	0.175500036	-0.269804492	0.185291483	0.160200308	0.025091175	0.272	0.1206	0.1001	0.0721	0.2456	0.0323	0.0218	0.1488	-0.0113	0.2125	0.3358
9759	0.212552318	0.0413045	-0.171247818	0.758624131	0.613477024	0.145147107	0.478	0.2756	0.7715	0.3913	0.3276	0.3939	1.0266	0.5069	0.9447	0.6909	0.9215
9760	0.472456148	0.148400063	-0.324056085	0.667355329	0.537473593	0.129881736	0.1967	0.2242	1.091	0.861	0.2543	1.0008	0.7671	0.4506	0.2231	1.3714	1.1748
9761	0.473693978	0.084709776	-0.388984201	0.494009245	0.384759124	0.109250121	-0.0892	-0.1589	0.1014	-0.0801	-0.1792	0.1558	0.1624	0.2054	0.1477	0.1142	0.0119
9795	0.446132979	0.082437842	-0.363695137	0.461806362	0.261742025	0.200064337	0.1523	0.1015	0.5963	0.3542	0.2855	0.0559	0.6007	1.0636	0.5452	0.2878	-0.1617
9796	0.946136519	0.445900988	-0.50023553	1.177993806	0.684653868	0.493339939	0.1833	0.4141	0.8188	0.8415	0.3289	0.7027	0.7903	0.9502	0.7727	0.6269	1.0175
9797	-0.04373184	-0.072896017	-0.029164178	0.345991977	0.32521107	0.020780907	-0.0219	0.0222	0.2666	0.2945	0.0553	0.2377	0.4259	0.0623	-0.1519	0.5522	0.0761
9804	0.853514884	0.494305552	-0.359209331	0.157067461	0.127757289	0.029310172	0.4554	0.6759	0.7153	0.5682	0.4484	-0.2849	0.605	0.4506	0.5071	0.0485	0.4253
9805	1.017162823	0.526557572	-0.490605251	0.663111982	0.431400308	0.231711675	0.4394	0.2834	0.3988	0.3326	0.3515	0.8255	0.5199	0.7195	0.1853	0.334	0.5304
9806	1.474087111	0.622761225	-0.851325886	0.835068186	0.357422865	0.477645321	0.2251	0.1001	0.3723	1.2076	0.0879	0.1384	0.5325	0.107	0.2955	-0.1783	0.2082
9807	0.063775486	-0.207624639	-0.271400126	0.121402986	0.118531583	0.002871404	0.2345	0.2599	0.4225	0.3255	0.1435	0.259	0.498	0.4666	0.3433	0.3411	0.3575
9808	0.264362712	0.048288218	-0.216074494	0.159234162	0.123146879	0.036087283	0.2466	0.1942	0.2934	0.5931	0.1924	0.0369	0.2959	0.2934	0.2361	0.121	0.0875
9828	0.444525391	0.113670963	-0.330854428	0.158900047	0.127543724	0.031356323	0.0966	-0.0846	0.4785	0.4401	0.195	0.2017	0.0919	0.9035	0.3727	0.0082	0.4227
9847	0.047052559	0.10931372	0.062261161	0.267965638	0.211489939	0.056475699	-0.1316	-0.6219	-0.2517	0.4801	-0.1089	-0.0805	-0.2361	-0.4726	0.1416	-0.08	0.4485
9848	0.53220711	0.387275262	-0.144931848	0.532647763	0.39485005	0.137797713	0.0979	0.1388	0.4515	-0.0189	0.2084	0.198	0.4213	0.3793	0.3775	0.0821	0.2929
9849	0.429881077	0.123080019	-0.306801057	0.166471483	0.128059483	0.038412	0.2147	0.4689	-0.3537	0.4506	0.35	0.0899	0.6507	0.1553	1.2342	0.1202	0.9087
9850	1.17353111	0.470618581	-0.702912529	0.704650282	0.326931866	0.377718416	0.7289	0.361	0.2879	0.4055	0.3284	0.8385	0.278	-0.1314	0.5816	0.5149	0.209
9851	0.988713699	0.261848063	-0.726865636	1.097341326	0.717305407	0.380035919	0.5395	0.3311	0.9345	0.6217	0.6609	0.2737	0.694	0.8196	0.5368	0.2402	0.8121
9875	0.534490368	0.125758625	-0.408731743	0.408907979	0.193564842	0.215343137	0.4255	0.4494	0.5139	0.5936	0.0995	0.5439	0.563	0.785	0.4968	0.4282	0.5027
9876	0.291030803	-0.046983182	-0.338013984	0.309089521	0.219537991	0.08955153	-0.1008	-0.0436	0.2373	0.4448	0.2184	0.1463	0.3403	0.2293	0.2639	0.1947	0.2641
9877	-0.482722438	-0.285752478	0.196969959	0.163008223	0.199589021	-0.036580798	-0.2886	-0.5908	-1.0474	-1.2385	-0.747	-1.0361	-0.8812	-1.3346	-1.2145	-0.9371	-0.9989
9897	0.765903953	0.464719811	-0.301184142	0.543344925	0.341434897	0.201910028	0.3865	-0.3275	0.5406	0.182	-0.0671	0.1613	0.6411	0.5807	0.2609	0.1351	0.2201
9898	0.278451874	0.079204088	-0.199247785	0.115252289	0.111887824	0.003364465	-0.0901	-0.2131	0.2434	-0.1044	-0.0668	-0.2455	-0.2133	0.2451	-0.1043	-0.084	0.0282
9932	0.765721531	0.362724236	-0.402997295	0.551490734	0.341272685	0.21021805	0.4404	0.3421	0.7142	0.7419	0.3804	0.3939	0.7394	0.3919	0.5319	0.3165	0.7787
9933	0.443697132	0.053383242	-0.39031389	0.284939757	0.202774667	0.08216509	0.1873	0.3098	0.8822	0.9123	0.3543	0.484	0.8608	0.8198	0.3472	0.6666	0.7925
9934	0.380047215	0.326840605	-0.05320661	0.111912413	0.111071868	0.000840545	0.2418	0.1375	0.1848	0.0182	0.3955	0.0763	0.374	0.188	0.354	0.1604	0.0568
9935	0.469651539	0.140071512	-0.329580028	0.113137715	0.11079824	0.002339475	0.5975	-0.0092	1.1302	0.6527	0.3439	0.2194	0.9859	0.6807	0.7726	0.5796	1.1003
